# Supplementary material
Source: Springer Nature journal article supplement (https://www.springermedizin.de/resource/supplementary/13045_2013_302_MOESM6_ESM.pdf/9661078)

## Hematologic Improvement

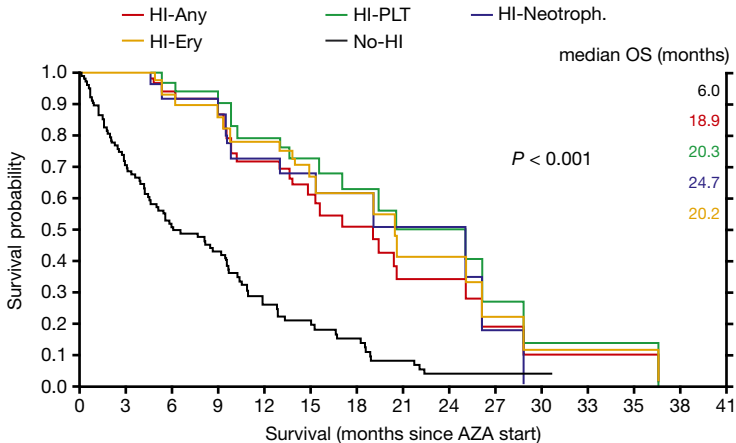

### Number at risk

|              |     |    |    |    |    |    |    |   |   |   |   |   |   |
|--------------|-----|----|----|----|----|----|----|---|---|---|---|---|---|
| HI-Any       | 49  | 49 | 41 | 37 | 29 | 20 | 14 | 8 | 6 | 2 | 1 | 1 | 1 |
| HI-PLT       | 33  | 33 | 30 | 26 | 29 | 17 | 12 | 8 | 6 | 2 | 1 | 1 | 1 |
| HI-Neutroph. | 24  | 24 | 20 | 19 | 15 | 11 | 6  | 5 | 3 | 1 |   |   |   |
| HI-Ery       | 31  | 31 | 26 | 24 | 21 | 14 | 11 | 6 | 5 | 2 | 1 | 1 | 1 |
| No-HI        | 106 | 70 | 49 | 38 | 21 | 16 | 11 | 6 | 3 | 2 | 1 |   |   |

Supplement: MOESM6 [file 9661078]
